# Supplementary material
Source: Research Square preprint supplement (doi:10.21203/rs.3.rs-9518616/v1)
Supplement: Supplementary file 2 [file 99550143a32bcbd7002dd218.docx]

### Table 4.1: The Role of Motivation in Learning Social Skills

| **Variables** | **Sample (n)** | **Mean (m)** | **Std. Deviation (sd)** | **Deg. of Freedom (df)** | **t-value (t)** | **p-value (p) (One-tailed)** |
| --- | --- | --- | --- | --- | --- | --- |
| Communication Skills | 162 | 3.05 | 0.49 | 161 | 52.85 | 0.00 |
| Cooperation Skills | 162 | 3.09 | 0.60 | 161 | 44.10 | 0.00 |
| Problem-Solving Skills | 162 | 3.23 | 0.40 | 161 | 71.02 | 0.00 |
| Emotional Control Skills | 162 | 2.97 | 0.51 | 161 | 48.31 | 0.00 |
| Learning Motivation | 162 | 2.98 | 0.48 | 161 | 51.99 | 0.00 |
| **Expected Mean = 2.50** |  |  |  |  |  |  |

### Table 4.2: Social Skill Usage in Relation to Gender

| **Variables** | **Gender** | **Mean** | **Std. Deviation (SD)** | **Deg. of Freedom (DF)** | **t-value (t)** | **p-value (p)** |
| --- | --- | --- | --- | --- | --- | --- |
| Communication Skills | Male | 24.32 | 3.54 | 160 | -1.23 | P > 0.05 |
|  | Female | 24.70 | 4.15 |  |  |  |
| Cooperation Skills | Male | 30.46 | 5.21 | 160 | -2.59 | P < 0.05 |
|  | Female | 31.45 | 6.58 |  |  |  |
| Problem-Solving Skills | Male | 22.45 | 3.08 | 160 | -3.56 | P < 0.05 |
|  | Female | 23.39 | 2.55 |  |  |  |
| Emotional Control Skills | Male | 20.75 | 3.77 | 160 | -0.37 | P > 0.05 |
|  | Female | 20.86 | 3.53 |  |  |  |
| **Number of participants: Male = 81, Female = 81, Total = 162** |  |  |  |  |  |  |

### Table 4.3: Correlation Between Social Skills and Learning Motivation

| **Variables** | **Mean** | **1** | **2** | **3** | **4** | **5** |
| --- | --- | --- | --- | --- | --- | --- |
| 1. Communication Skills | 3.05 | 1 |  |  |  |  |
| 2. Cooperation Skills | 3.09 | 0.841** | 1 |  |  |  |
| 3. Problem-Solving Skills | 3.23 | 0.016 | 0.26 | 1 |  |  |
| 4. Emotional Control Skills | 2.97 | 0.695** | 0.681** | 0.16* | 1 |  |
| 5. Learning Motivation | 2.98 | 0.884** | 0.782** | 0.14* | 0.922** | 1 |
| 6. Academic Achievement | 36.11 | 0.535** | 0.603** | 0.064* | 0.416** | 0.475** |
| **Sample size = 162, ** = High correlation, * = Low correlation, p < 0.05** |  |  |  |  |  |  |

### Table 4.4: Prediction of Social Skills on Students' Academic Achievement

| **Variables** | **2*R*2** | **Unstandardized (B)** | **Beta (ß)** | **t-test** | **Sig. Level (P)** |
| --- | --- | --- | --- | --- | --- |
| Communication Skills | 0.369 | 0.836 | 0.100 | 0.813 | 0.418 |
| Cooperation Skills |  | 3.601 | 0.527 | 4.357 | 0.000 |
| Problem-Solving Skills |  | 0.507 | 0.049 | 0.775 | 0.440 |
| Emotional Control Skills |  | -0.108 | -0.014 | -0.150 | 0.881 |

| **One-Sample Statistics** | | | | |
| --- | --- | --- | --- | --- |
|  | N | Mean | Std. Deviation | Std. Error Mean |
| communication skill | 162 | 3.0525 | .49429 | .03883 |
| cooperative skill | 162 | 3.0957 | .60457 | .04750 |
| problem solving skil | 162 | 3.2346 | .40047 | .03146 |
| self-control | 162 | 2.9727 | .51974 | .04083 |
| academic motivation | 162 | 2.9802 | .48474 | .03808 |
| academic performance | 162 | 36.2119 | 4.12967 | .32446 |

| **One-Sample Test** | | | | | | |
| --- | --- | --- | --- | --- | --- | --- |
|  | Test Value = 1 | | | | | |
| t | df | Sig. (2-tailed) | Mean Difference | 95% Confidence Interval of the Difference | |
| Lower | Upper |
| communication skill | 52.851 | 161 | .000 | 2.05247 | 1.9758 | 2.1292 |
| cooperative skill | 44.120 | 161 | .000 | 2.09568 | 2.0019 | 2.1895 |
| problem solving skil | 71.019 | 161 | .000 | 2.23457 | 2.1724 | 2.2967 |
| self-control | 48.308 | 161 | .000 | 1.97266 | 1.8920 | 2.0533 |
| academic motivation | 51.996 | 161 | .000 | 1.98025 | 1.9050 | 2.0555 |
| academic performance | 108.526 | 161 | .000 | 35.21193 | 34.5712 | 35.8527 |
