# Supplementary material
Source: Research Square preprint supplement (doi:10.21203/rs.3.rs-9518616/v1)
Supplement: Supplementary file 3 [file d1e9edfe243fcf19bc36a224.docx]

**Appendix 2**

**Appendix 1: Questionnaire to be filled by college students**

**Sekota College of Teacher Education, Department of Pedagogy and Natural Sciences Research Program; Student Questionnaire**

Dear student, we would like to thank you in advance for your willingness to complete this questionnaire. This questionnaire is designed to investigate the role of social skills on students' learning motivation and academic achievement, and it is intended to collect information to help the teaching-learning process. Therefore, we kindly ask for your assistance in making the research work complete by providing appropriate responses to the questions listed below.

Samuel Kefelew
Desalegn Wolde
 **May 2024**

**General Instructions**

- It is not necessary to write your name on the questionnaire.

**Part One: Background Information**
**Instruction:** Fill in the correct response for the following information in the blank spaces provided.

- Sex: _______
- Age: _________________
- Average score (out of 50%) obtained from all courses: ----------------

**Part Two: Questions regarding Social Skills**
**Instruction:** After reading the following questions, please indicate your answer by placing a tick mark (√) in the column that represents your choice.

**Choices:**
4. Strongly Agree
3. Agree
2. Disagree

1. Strongly Disagree

| **No.** | **Activities** | **Scale** |  |  |  |
| --- | --- | --- | --- | --- | --- |
| **A** | **Learning Motivation** | **4** | **3** | **2** | **1** |
| 1 | I try to give correct answers more than my friends. |  |  |  |  |
| 2 | I like reading content that is challenging and requires a lot of effort. |  |  |  |  |
| 3 | My test results show my hard work. |  |  |  |  |
| 4 | I try to learn more after the teacher teaches a topic. |  |  |  |  |
| 5 | I want to score high by paying attention to the courses. |  |  |  |  |
| 6 | I like focusing particularly on subjects I love. |  |  |  |  |
| 7 | I usually go to the library with my friends. |  |  |  |  |
| 8 | I want to find new information on topics that interest me. |  |  |  |  |
| 9 | I regularly ask questions about things I don't understand in class. |  |  |  |  |
| 10 | I perform educational tasks to the best of my ability. |  |  |  |  |
| 11 | Sometimes my friends tell me I am a good student. |  |  |  |  |
| 12 | My friends and I exchange academic information. |  |  |  |  |
| 13 | I do not study by preparing a schedule for each course. |  |  |  |  |
| 14 | I enjoy learning at the college level. |  |  |  |  |
| 15 | I don't want to learn unless I am forced to. |  |  |  |  |
| **B** | **Communication Skills** | **4** | **3** | **2** | **1** |
| 16 | I respect my friends' ideas in class. |  |  |  |  |
| 17 | My communication with my friends is positive. |  |  |  |  |
| 18 | My relationship with teachers is minimal. |  |  |  |  |
| 19 | Communicating with many students is harmful. |  |  |  |  |
| 20 | Communication is a reason for being effective. |  |  |  |  |
| 21 | My results have improved since I started getting to know good students. |  |  |  |  |
| 22 | I ask students to join in practical work. |  |  |  |  |
| 23 | I accept others' feedback or responses without getting angry. |  |  |  |  |
| **C** | **Cooperative Skills** | **4** | **3** | **2** | **1** |
| 24 | I am always willing to help my friends both inside and outside the classroom. |  |  |  |  |
| 25 | I ask my friends when I need help. |  |  |  |  |
| 26 | I prefer listening to others' ideas rather than speaking myself. |  |  |  |  |
| 27 | I have realized that learning collaboratively makes one effective. |  |  |  |  |
| 28 | Collaborative learning has helped me exchange various information and experiences with my friends. |  |  |  |  |
| 29 | Collaborative learning takes up time in the process of conveying an idea. |  |  |  |  |
| 30 | My social relationship with my friends is high. |  |  |  |  |
| 31 | My desire for collaborative learning is low. |  |  |  |  |
| 32 | I have been effective because we work in groups in class. |  |  |  |  |
| 33 | I support mutual aid, helping each other, and standing together. |  |  |  |  |
| **D** | **Problem Solving Skills** | **4** | **3** | **2** | **1** |
| 34 | I present my ideas by waiting for my turn during group discussions. |  |  |  |  |
| 35 | I listen actively and encourage others to listen like me. |  |  |  |  |
| 36 | I resolve disagreements with my friends peacefully. |  |  |  |  |
| 37 | I graciously accept the difference in students' abilities. |  |  |  |  |
| 38 | I try to show the difference of opinion with my friends through argument without any anger. |  |  |  |  |
| 39 | I have solved conflicts that arise between students in the right way. |  |  |  |  |
| 40 | I have taken the contributions of others as constructive. |  |  |  |  |
| **E** | **Self-Control Skills** | **4** | **3** | **2** | **1** |
| 41 | I respect classroom rules and regulations one by one. |  |  |  |  |
| 42 | During conflict, I calm others by controlling my emotions. |  |  |  |  |
| 43 | I feel happy when I offend my classmates. |  |  |  |  |
| 44 | I need teachers' help to control myself. |  |  |  |  |
| 45 | The volume I use during my speech is moderate. |  |  |  |  |
| 46 | I clearly understand my level of academic reception. |  |  |  |  |
| 47 | I contribute my part to maintain the silence of the classroom. |  |  |  |  |
